# Supplementary material for: The thioredoxin-1 system is essential for fueling DNA synthesis during T-cell metabolic reprogramming and proliferation
Source: Springer Nature journal article supplement (doi:10.1038/s41467-018-04274-w), 2018-05-04
Supplement: MOESM1 [file 41467_2018_4274_MOESM1_ESM.pdf › 41467_2018_4274_MOESM1_ESM.pdf]

# **Supplementary Information**

**The thioredoxin-1 system is essential for fueling DNA synthesis during T  
cell metabolic reprogramming and proliferation**

Muri et al.

## Supplementary Figures

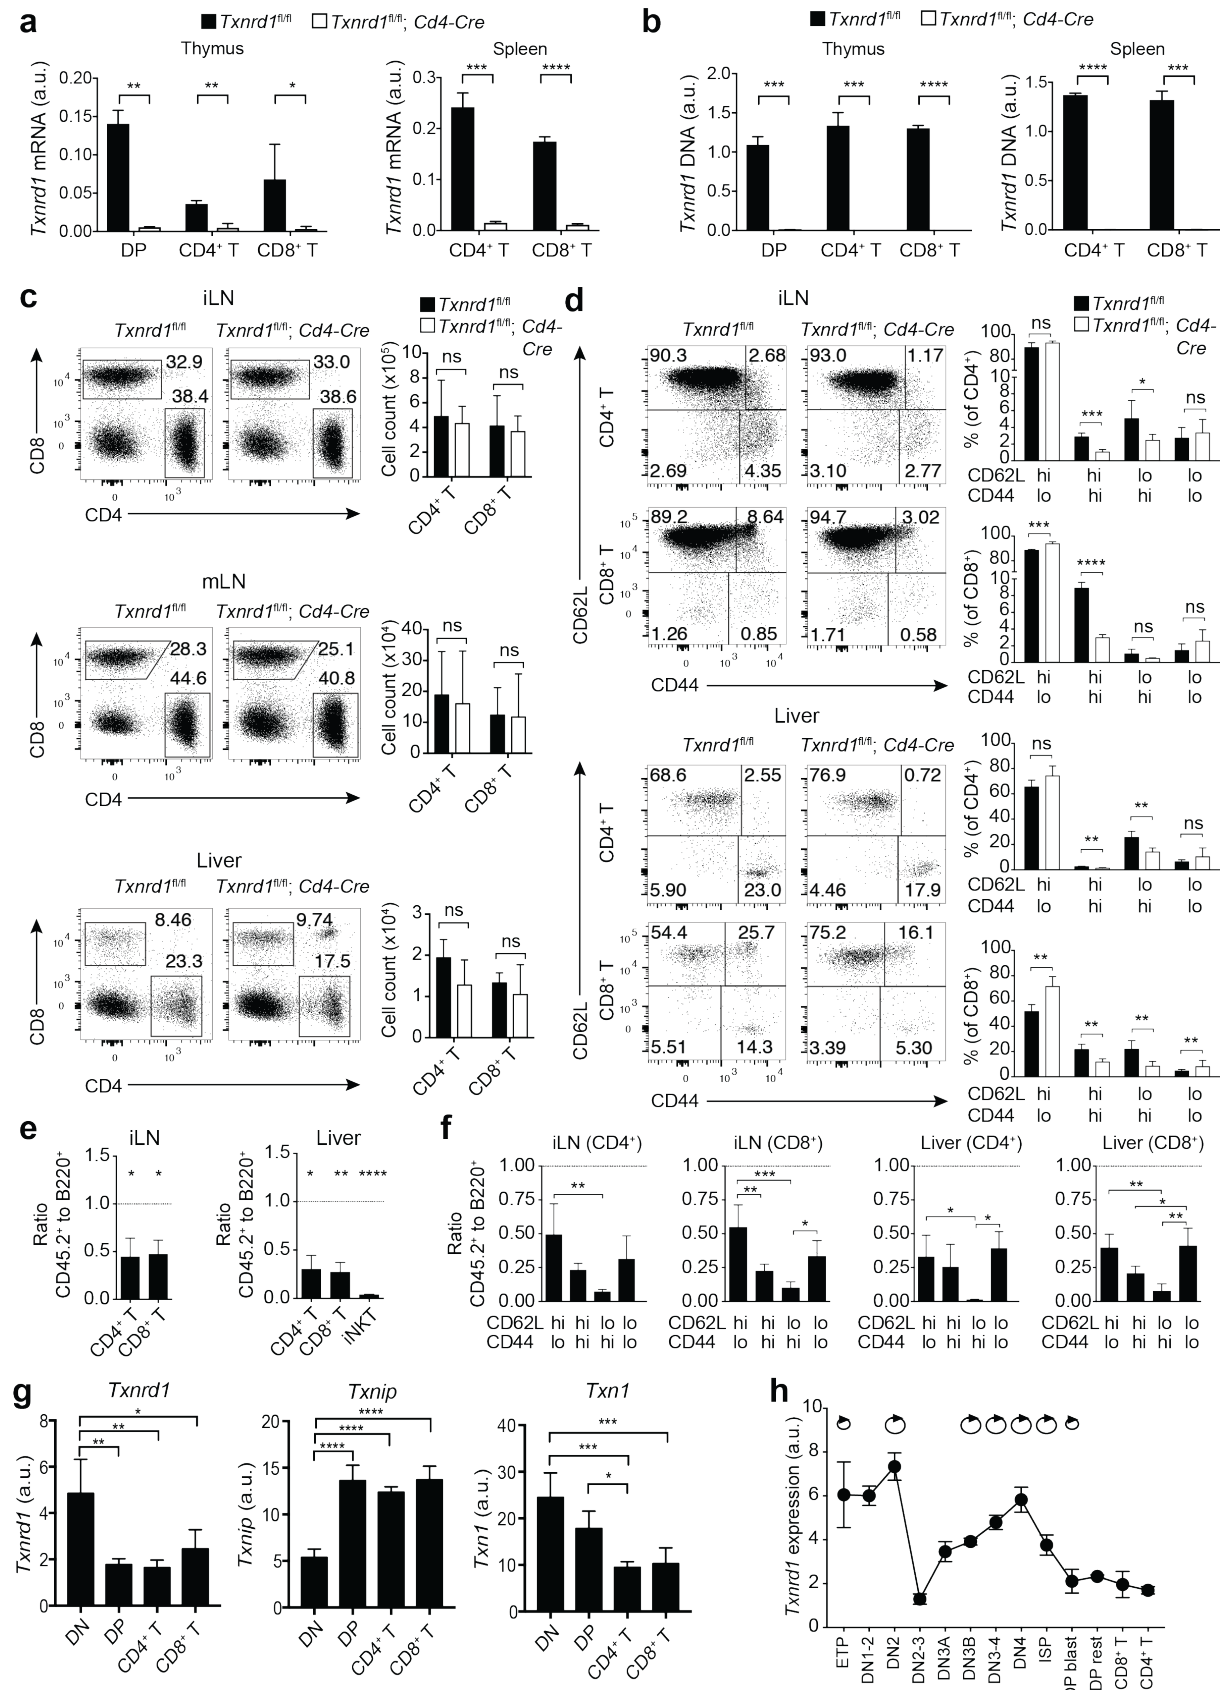

**Supplementary Figure 1. *Txnrd1* is required for the generation of activated/memory T cells.** (a, b) Analysis of *Txnrd1* mRNA (a) and genomic *Txnrd1* DNA (b) in DP and SP thymocytes (left), and splenic T cells (right) determined by RT-PCR (n=4). (c, d) Numbers and percentages of the indicated T cell populations were analyzed in naïve *Txnrd1<sup>fl/fl</sup>;Cd4-Cre* and *Txnrd1<sup>fl/fl</sup>* littermate control mice. Representative FACS plots (left) and quantification (right) are shown (n=4-5). (c) CD4<sup>+</sup> TCRβ<sup>+</sup> (CD4<sup>+</sup> T) and CD8<sup>+</sup> TCRβ<sup>+</sup> (CD8<sup>+</sup> T) T cells in inguinal lymph nodes (iLN; top), mesenteric LNs (mLN; middle) and livers (bottom). (d) Expression of CD62L and CD44 in iLN (top) and liver (bottom) T cells. (e, f) Lethally irradiated WT mice were reconstituted with a 1:1 mixture of WT and *Txnrd1<sup>fl/fl</sup>;Cd4-Cre* bone marrow expressing the congenic markers CD45.1 and CD45.2, respectively. After reconstitution, the indicated T cell populations in iLN and liver from *Txnrd1<sup>fl/fl</sup>;Cd4-Cre* donor mice were normalized to non-Cre expressing CD45.2<sup>+</sup>CD19<sup>+</sup> B cells. A value below 1 indicates a reduced contribution of *Txnrd1*-deleted T cells to the indicated population compared to WT cells (n=4). (g) Expression levels of *Txnrd1*, *Txnip* and *Txn1* determined by RT-PCR for sorted DN (CD4<sup>-</sup>CD8<sup>-</sup>TCRγδ<sup>-</sup>), DP (CD4<sup>+</sup>CD8<sup>+</sup>), CD4<sup>+</sup> (CD4<sup>+</sup>CD8<sup>-</sup>TCRβ<sup>+</sup>) and CD8<sup>+</sup> (CD8<sup>+</sup>CD4<sup>-</sup>TCRβ<sup>+</sup>) populations from WT mice (n=4). (h) Expression levels of *Txnrd1* determined by RT-PCR for the indicated FACS-sorted thymocyte populations from WT mice. Circular arrows indicate proliferating populations (n=4). Bar graphs show mean + standard deviation. Data are representative of two (a, b, e-h) and three (c, d) independent experiments. Student's *t* test (two-tailed, unpaired) was used to compare *Txnrd1<sup>fl/fl</sup>* and *Txnrd1<sup>fl/fl</sup>;Cd4-Cre* groups (a-d): \*, *P* ≤ 0.05; \*\*, *P* ≤ 0.01; \*\*\*, *P* ≤ 0.001; \*\*\*\*, *P* ≤ 0.0001; ns, not significant. One-sample *t* test with a hypothetical value of 1 was used in (e): \*, *P* ≤ 0.0332; \*\*, *P* ≤ 0.0021; \*\*\*\*, *P* ≤ 0.0001. One-way ANOVA adjusted by Tukey's multiple comparison test was used in (f, g): \*, *P* ≤ 0.05; \*\*, *P* ≤ 0.01; \*\*\*, *P* ≤ 0.001.



**Supplementary Figure 2. *Txnrd1* is critically required for thymic T cell development.** (a, b) Analysis of *Txnrd1* mRNA (a) and genomic *Txnrd1* DNA (b) in splenic T cells determined by RT-PCR (n=4). (c) Total numbers of the indicated thymic cell populations from WT, *Cre-ERT2*, *Txnrd1<sup>fl/fl</sup>* and *Txnrd1<sup>fl/fl</sup>;Cre-ERT2* mice (n=4-5). (d, e) Lethally irradiated WT mice (CD45.1<sup>+</sup>) were reconstituted with a mixture (1:1) of WT (CD45.1<sup>+</sup>CD45.2<sup>+</sup>) and TAM-treated *Txnrd1<sup>fl/fl</sup>;Cre-ERT2* (CD45.2<sup>+</sup>) bone marrow (or *Txnrd1<sup>fl/fl</sup>* as control). After reconstitution, the percentage of donor CD45.2<sup>+</sup> cells among the indicated cell populations was determined by flow cytometry (n=4-5). Shown are the percentages of the indicated thymic T cell populations (d) and of CD4<sup>+</sup> and CD8<sup>+</sup> T cells in spleen, inguinal LN and liver (e). Bar graphs show mean + standard deviation. Data are representative of two independent experiments. Student's *t* test (two-tailed, unpaired) was used to compare *Txnrd1<sup>fl/fl</sup>* and *Txnrd1<sup>fl/fl</sup>;Cre-ERT2* groups (a, b, d, e): \*\*,  $P \leq 0.01$ ; \*\*\*,  $P \leq 0.001$ ; \*\*\*\*,  $P \leq 0.0001$ . One-way AVOVA adjusted by Tukey's multiple comparison test was used in (c): \*,  $P \leq 0.05$ ; \*\*,  $P \leq 0.01$ ; \*\*\*,  $P \leq 0.001$ .

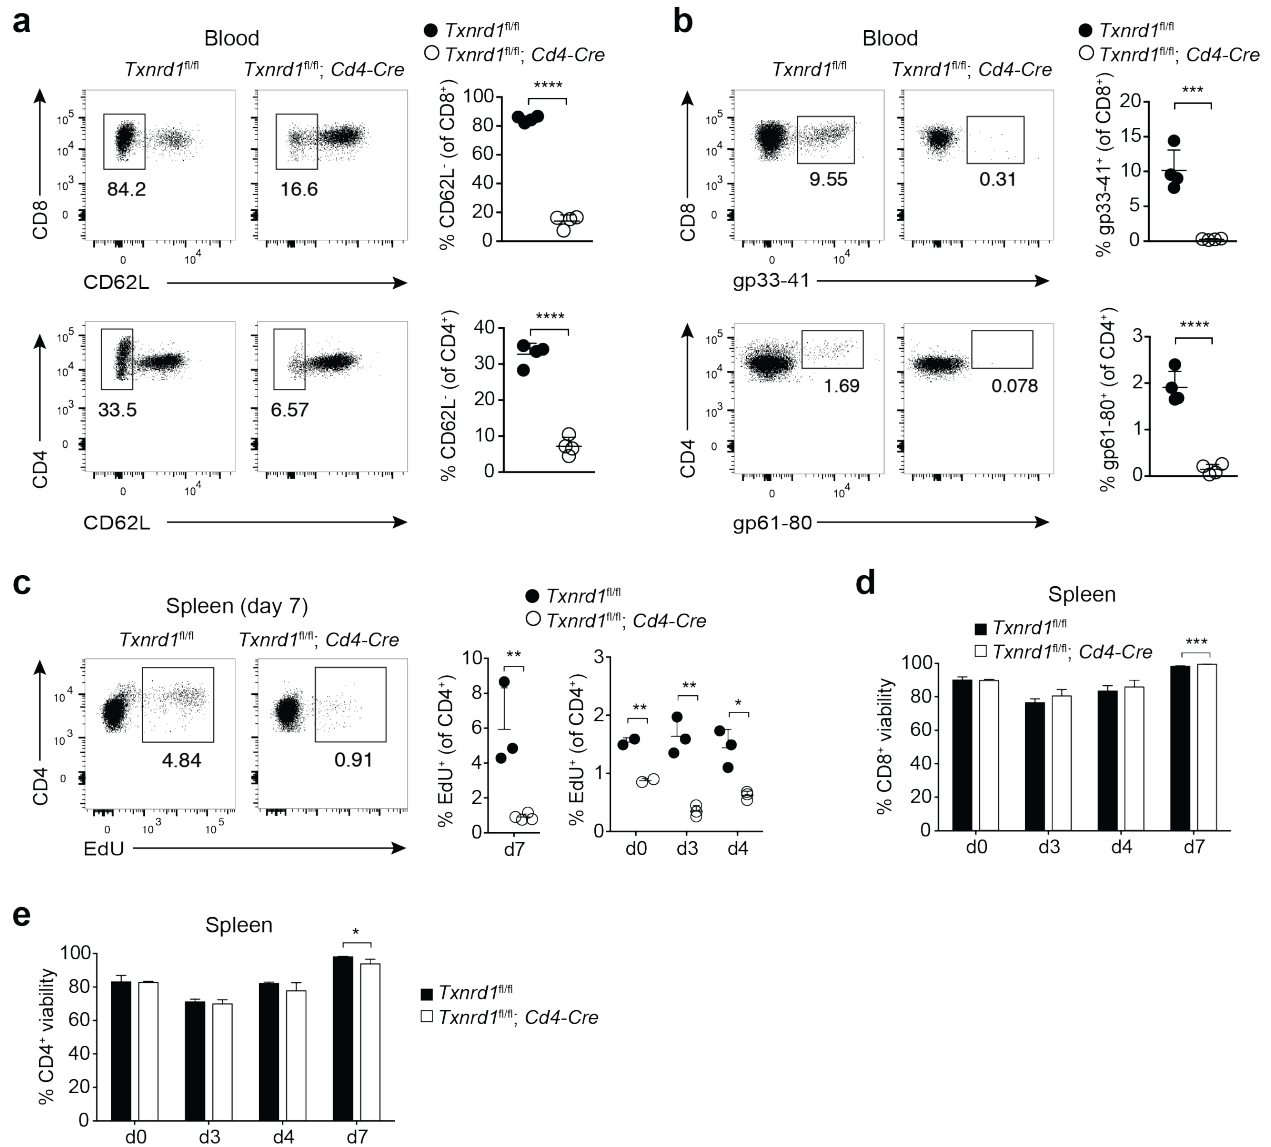

**Supplementary Figure 3. T cells require *Txnrd1* for efficient expansion during LCMV infection.** *Txnrd1<sup>fl/fl</sup>* and *Txnrd1<sup>fl/fl</sup>;Cd4-Cre* mice were infected with 200 focus-forming units (FFU) LCMV WE i.v., and T cells in blood were analyzed after 3, 4 and 7 days of infection. **(a-b)** On day 7 of infection, activation of CD4<sup>+</sup> and CD8<sup>+</sup> T cells in blood was assessed by down-regulation of CD62L **(a)**, and virus-specific T cells were stained with gp<sub>33-41</sub> and gp<sub>61-80</sub> tetramers **(b)**. **(c)** Proliferation of splenic CD4<sup>+</sup> T cells was assessed by EdU incorporation. Representative FACS plots (pre-gated on CD4<sup>+</sup>) and percentages of EdU<sup>+</sup> cells are shown on the left and right side, respectively. **(d, e)** Cell death was assessed by staining with Annexin-V and 7-AAD, and percentages of alive (Annexin-V<sup>-</sup> 7-AAD<sup>-</sup>) CD8<sup>+</sup> **(d)** and CD4<sup>+</sup> **(e)** T cells are shown (n=2-4). Means + standard deviations are shown. Data are representative of two independent experiments. Student's *t* test (two-tailed, unpaired) was used to compare *Txnrd1<sup>fl/fl</sup>* and *Txnrd1<sup>fl/fl</sup>;Cd4-Cre* groups **(a-e)**: \*, *P* ≤ 0.05; \*\*, *P* ≤ 0.01; \*\*\*, *P* ≤ 0.001; \*\*\*\*, *P* ≤ 0.0001.

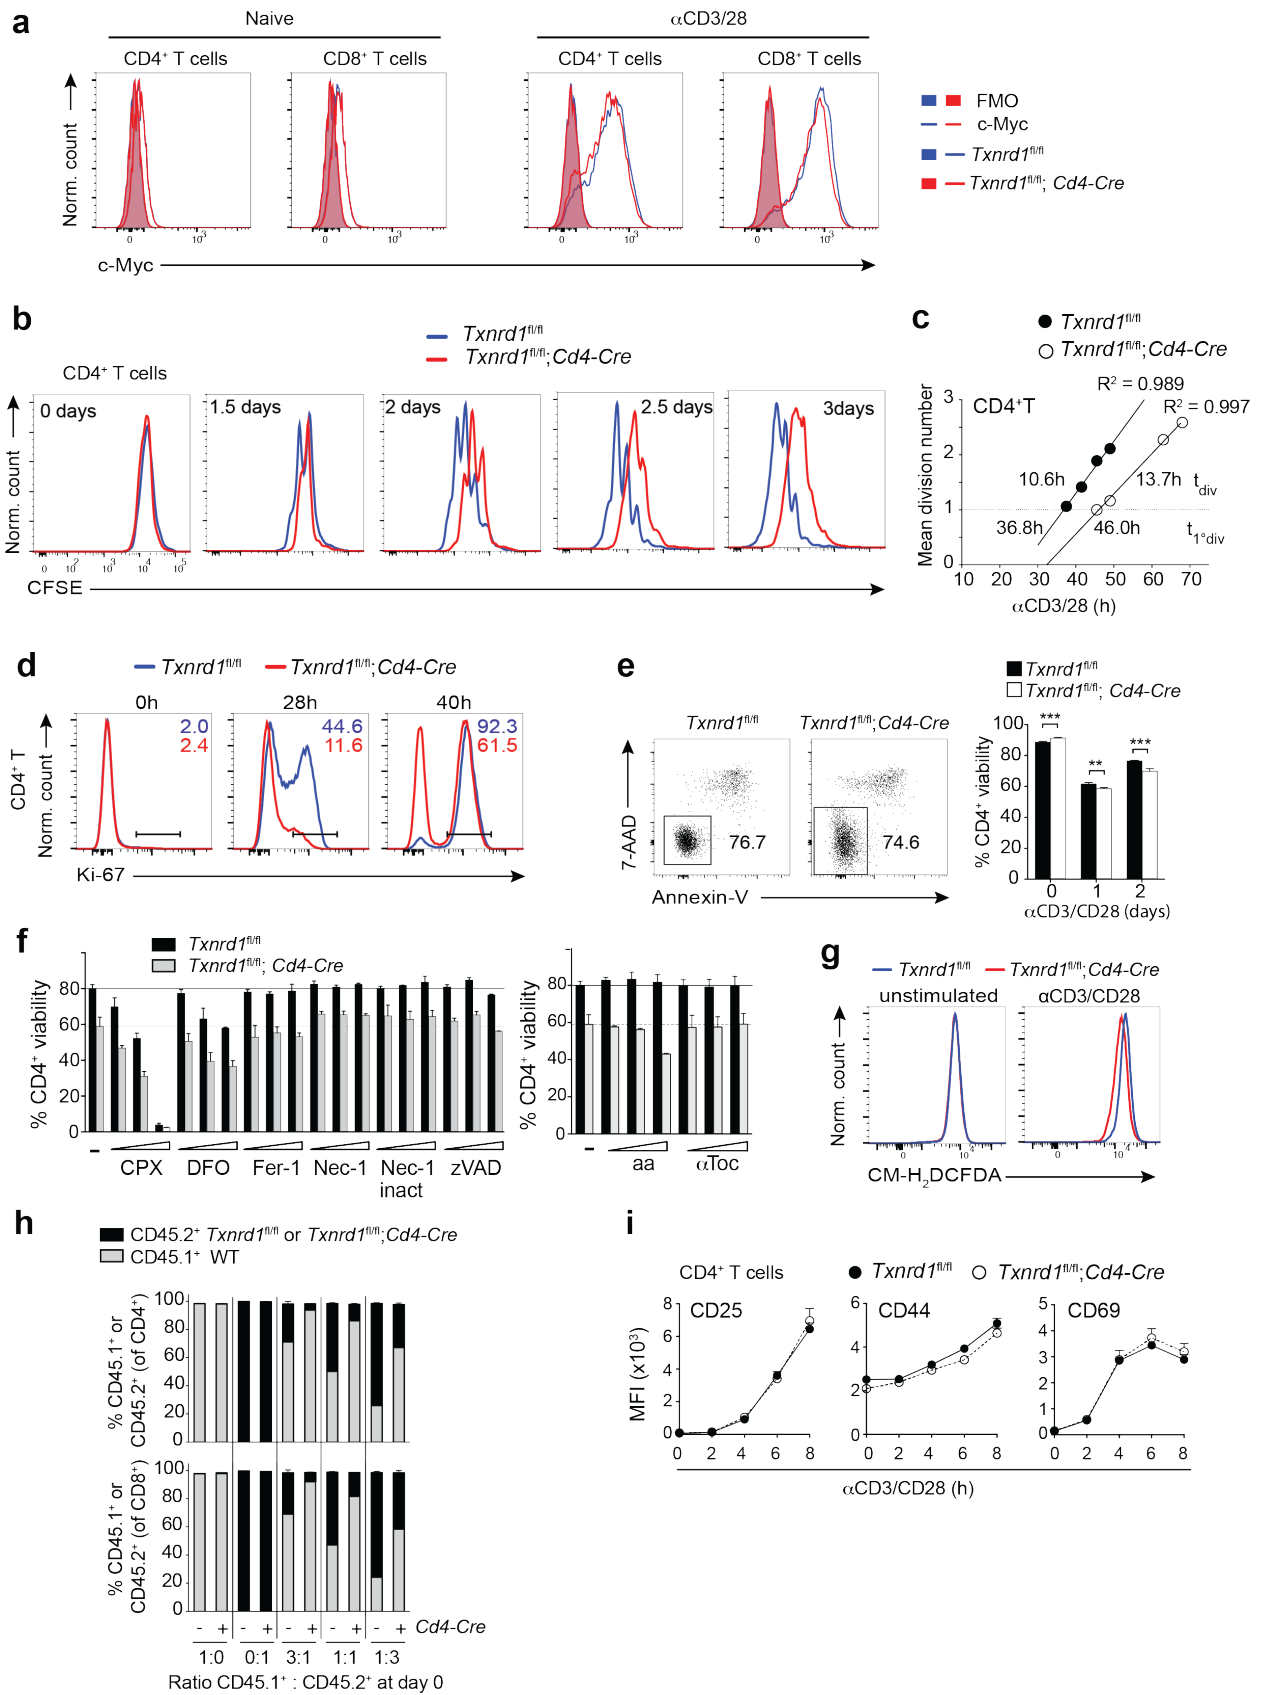



**Supplementary Figure 4. *Txnrd1*-deficient T cells undergo longer cell cycling.** Magnetically-sorted T cells from spleen and peripheral LNs of *Txnrd1<sup>fl/fl</sup>* and *Txnrd1<sup>fl/fl</sup>;Cd4-Cre* mice were stimulated in  $\alpha$ CD3/CD28-coated plates followed by flow cytometry analysis. (a) c-Myc protein expression level after 20 hours of T cells stimulation. (b) CFSE dilution of CD4<sup>+</sup> T cells at the indicated times of stimulation. (c) CFSE-dilution profiles were used to calculate mean division time ( $t_{\text{division}}$ ; reciprocal of the slope) and time to first division ( $t_{1^{\circ}\text{division}}$ ; intersection with mean division number  $y = 1$ ) with the *precursor cohort method*. (d) CD4<sup>+</sup> T cells leaving G<sub>0</sub> phase and entering cell cycle were detected by staining for Ki-67 at the indicated times of stimulation. Numbers in the plots indicate average percentage of Ki-67<sup>+</sup> cells from triplicate samples. (e) CD4<sup>+</sup> T cell death during  $\alpha$ CD3/CD28 stimulation was assessed by staining cells with Annexin-V and 7-AAD. Representative FACS plots of cells stimulated for 1 day as well as quantification of alive (Annexin-V<sup>-</sup> 7-AAD<sup>-</sup>) cells at the indicated times of stimulation (n=4). (f) Analysis of CD4<sup>+</sup> T cell survival upon incubation with the indicated cell death inhibitors and antioxidants during 24 hours of  $\alpha$ CD3/CD28 stimulation. Results for treatment with the ferroptosis inhibitors ciclopirox olamine (CPX; 8, 63, 500 nM), Deferoxamine (DFO; 1, 10, 50  $\mu$ M) and Ferrostatin-1 (Fer-1; 0.5, 2, 8  $\mu$ M); the necroptosis inhibitor Necrostatin-1 (Nec-1; 1, 4, 20  $\mu$ M) and the apoptosis inhibitor z-VAD-fmk (zVAD; 2, 12, 60  $\mu$ M) are shown in the left panel. Survival of T cells after addition of the antioxidants ascorbic acid (1, 6, 30  $\mu$ M) and  $\alpha$ -Tocopherol ( $\alpha$ Toc; 3, 16, 80  $\mu$ M) is shown in the right panel (n=2). (g) Representative FACS plots of ROS levels in unstimulated (left) and  $\alpha$ CD3/CD28-stimulated T cells (right), stained with CM-H<sub>2</sub>DCFDA. (h) T cells from WT (CD45.1<sup>+</sup>) and from *Txnrd1<sup>fl/fl</sup>;Cd4-Cre* mice (CD45.2<sup>+</sup>; or *Txnrd1<sup>fl/fl</sup>* as control) were mixed at the indicated ratios (1:0, 0:1, 3:1, 1:1, 1:3) and stimulated for 3 days. Percentages of CD45.1<sup>+</sup> (gray) and CD45.2<sup>+</sup> (black) for CD4<sup>+</sup> (top) and CD8<sup>+</sup> (bottom) are shown (n=3). (i) Expression of indicated activation markers in CD4<sup>+</sup> T cells measured by flow cytometry during the first 8h of stimulation (n=3). Bar graphs show mean + standard deviation. Data are representative of two (a, e-i), five (b), and three (c, d) independent experiments. Student's *t* test (two-tailed, unpaired) was used in (e): \*\*,  $P \leq 0.01$ ; \*\*\*,  $P \leq 0.001$ .

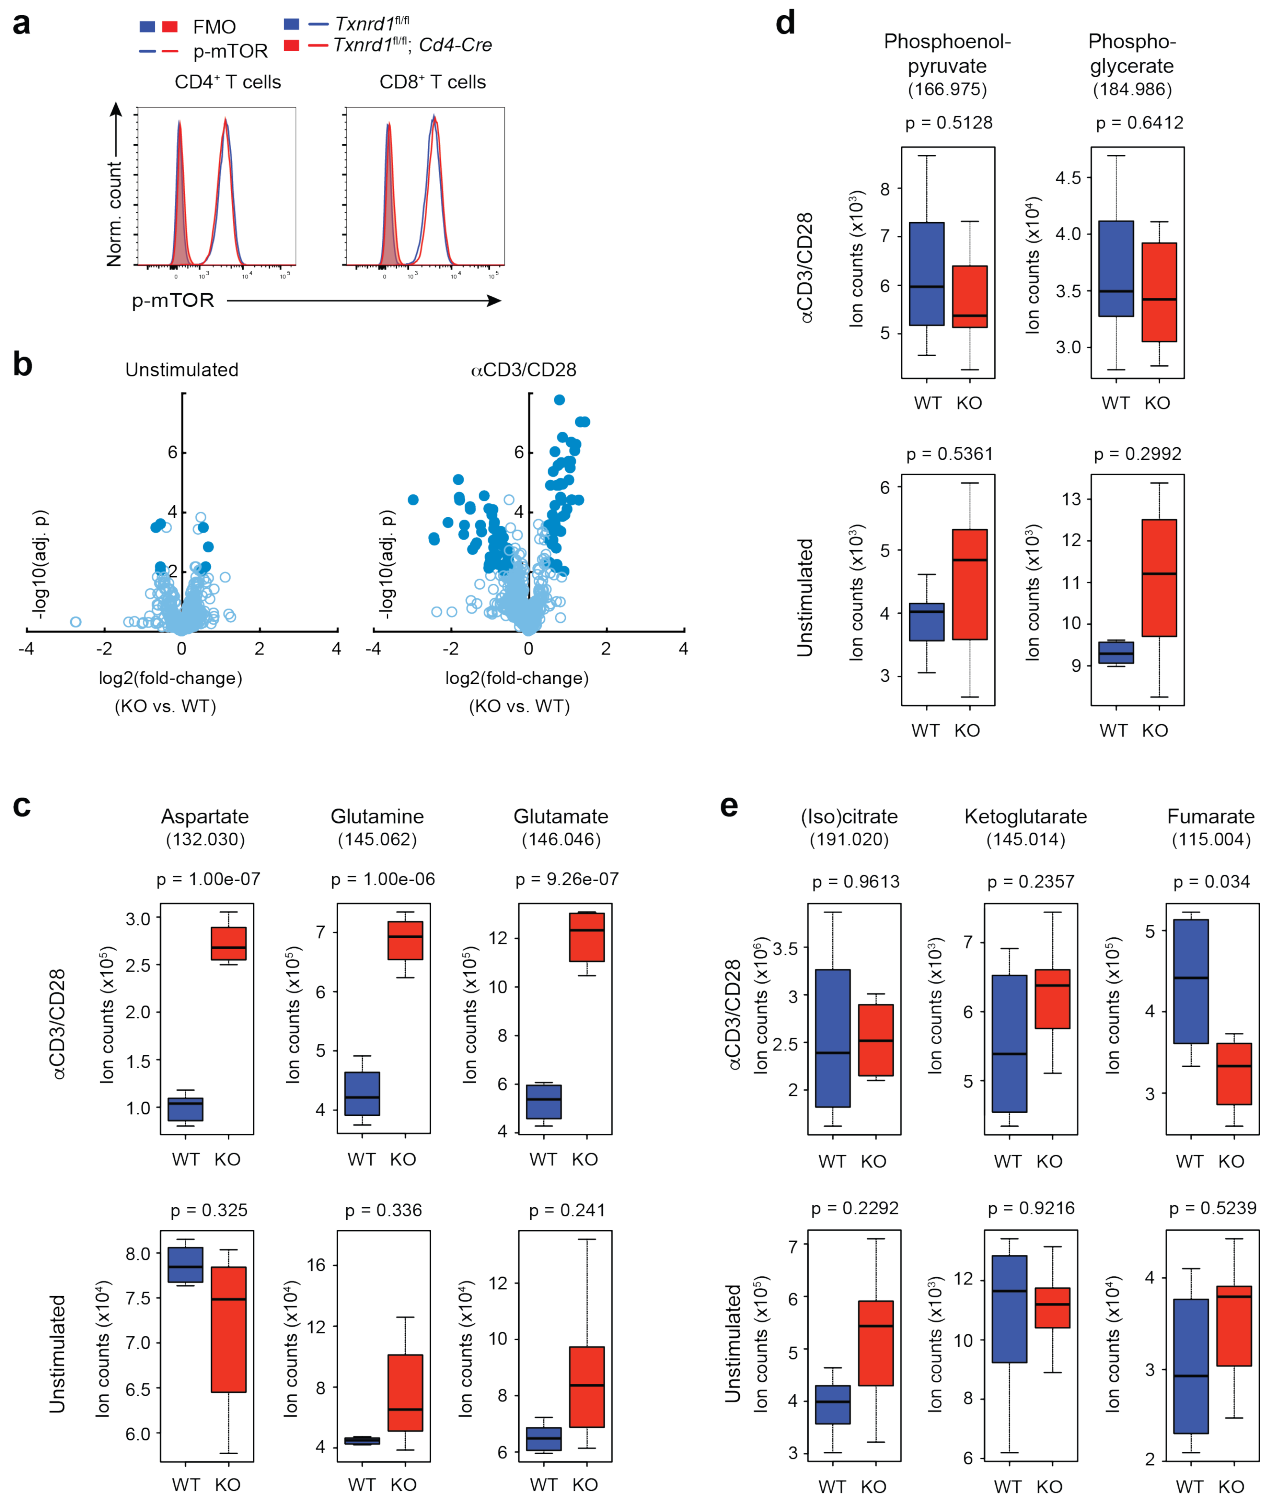

**Supplementary Figure 5. *Txnrd1* deficiency leads to aspartate and glutamine/glutamate accumulation.** Magnetically-sorted T cells from spleen and peripheral LNs of *Txnrd1<sup>fl/fl</sup>* (WT) and *Txnrd1<sup>fl/fl</sup>;Cd4-Cre* mice (KO) were stimulated in  $\alpha$ CD3/CD28-coated plates in vitro. **(a)** p-mTOR protein expression levels measured by flow cytometry after 48 hours of T cells stimulation. **(b-e)** Metabolites were analyzed by non-targeted metabolomics (four replicates were examined, each analyzed twice; as described for Fig. 5). **(b)** Volcano plots showing comparison of identified and annotated metabolites from stimulated (and unstimulated as control) WT and KO T cells. Closed circles indicate metabolites that changed significantly ( $|\text{Log}_2(\text{fold-change})| > 0.5$ ;  $p < 0.01$ ). **(c-e)** Box plots displaying aspartate, glutamine and glutamate **(c)**, glycolysis metabolites **(d)** and TCA cycle metabolite levels in WT and KO T cells **(e)**. Numbers in brackets represent the mass-to-charge ratio of the detected ions. Data are representative of two independent experiments. P-values of volcano plots were adjusted using Benjamini-Hochberg procedure **(b)**. The boxes represent the 25<sup>th</sup> to 75<sup>th</sup> percentiles, the horizontal lines within the boxes indicate the medians, and the whiskers are drawn to indicate the 1.5 x Inter Quartile Range (3<sup>rd</sup> quartile – 1<sup>st</sup> quartile; **c-e**). Student's *t* test (two-tailed, unpaired) corrected by the Benjamini-Hochberg multiple testing was used to compare WT and KO groups **(c-e)**.

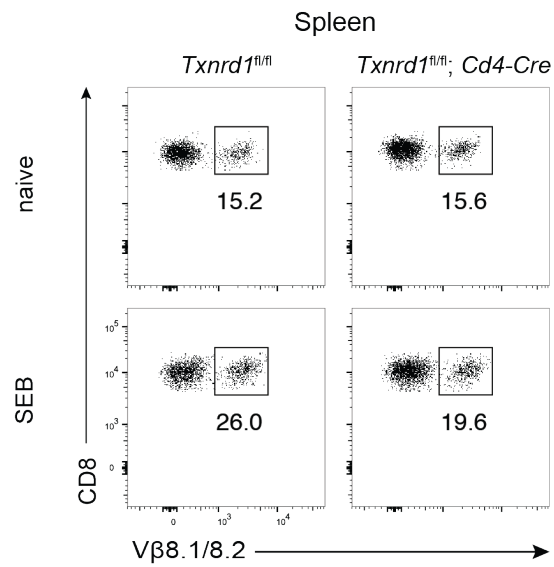

**Supplementary Figure 6. Representative FACS plots for Fig. 6b.** *Txnrd1<sup>fl/fl</sup>* and *Txnrd1<sup>fl/fl</sup>;Cd4-Cre* mice were treated i.p. with 100μg of SEB or PBS (naïve). Representative FACS plots showing Vβ8.1/8.2 expression of the CD8<sup>+</sup> T cells, which were FACS-sorted for RNA-seq analysis (shown in Fig. 6).

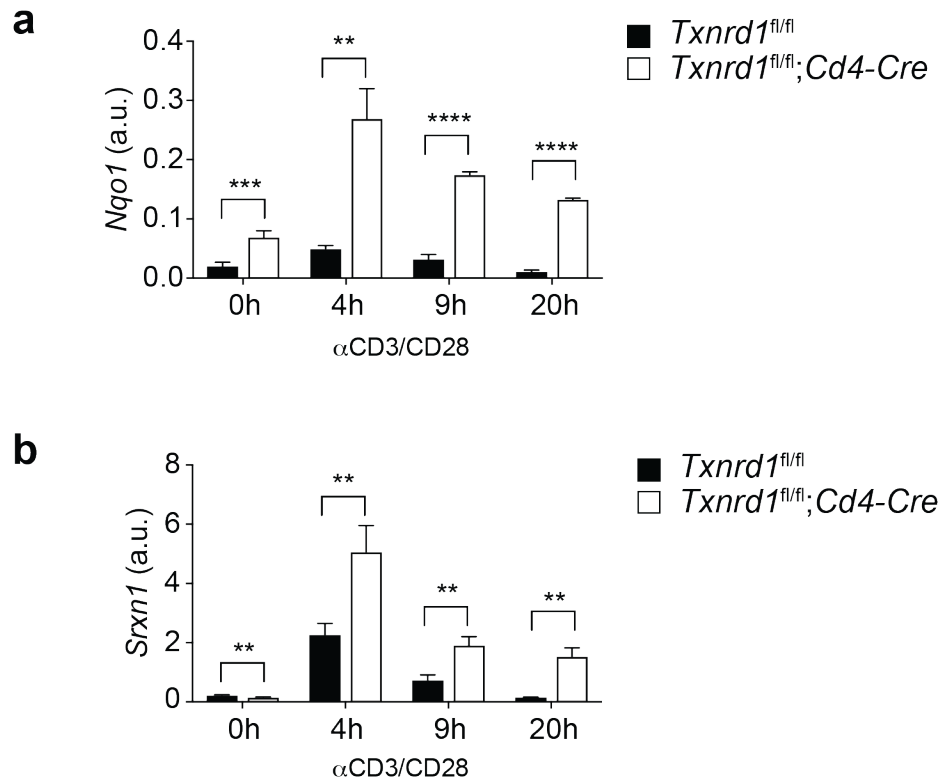

**Supplementary Figure 7. Increased expression of Nrf2 target genes in *Txnrd1*-deficient T cells.** (a-b) Magnetically-sorted T cells from spleen and peripheral LNs of naïve *Txnrd1*<sup>fl/fl</sup> and *Txnrd1*<sup>fl/fl</sup>;Cd4-Cre mice were stimulated in  $\alpha$ CD3/CD28-coated plates. *Nqo1* (a) and *Srxn1* (b) expression was assessed using RT-PCR at indicated times (n=3). Bar graphs show mean + standard deviation. Data are representative of two independent experiments. Student's *t* test (two-tailed, unpaired) was used to compare *Txnrd1*<sup>fl/fl</sup> and *Txnrd1*<sup>fl/fl</sup>;Cd4-Cre groups: \*\*,  $P \leq 0.01$ ; \*\*\*,  $P \leq 0.001$ ; \*\*\*\*,  $P \leq 0.0001$ .

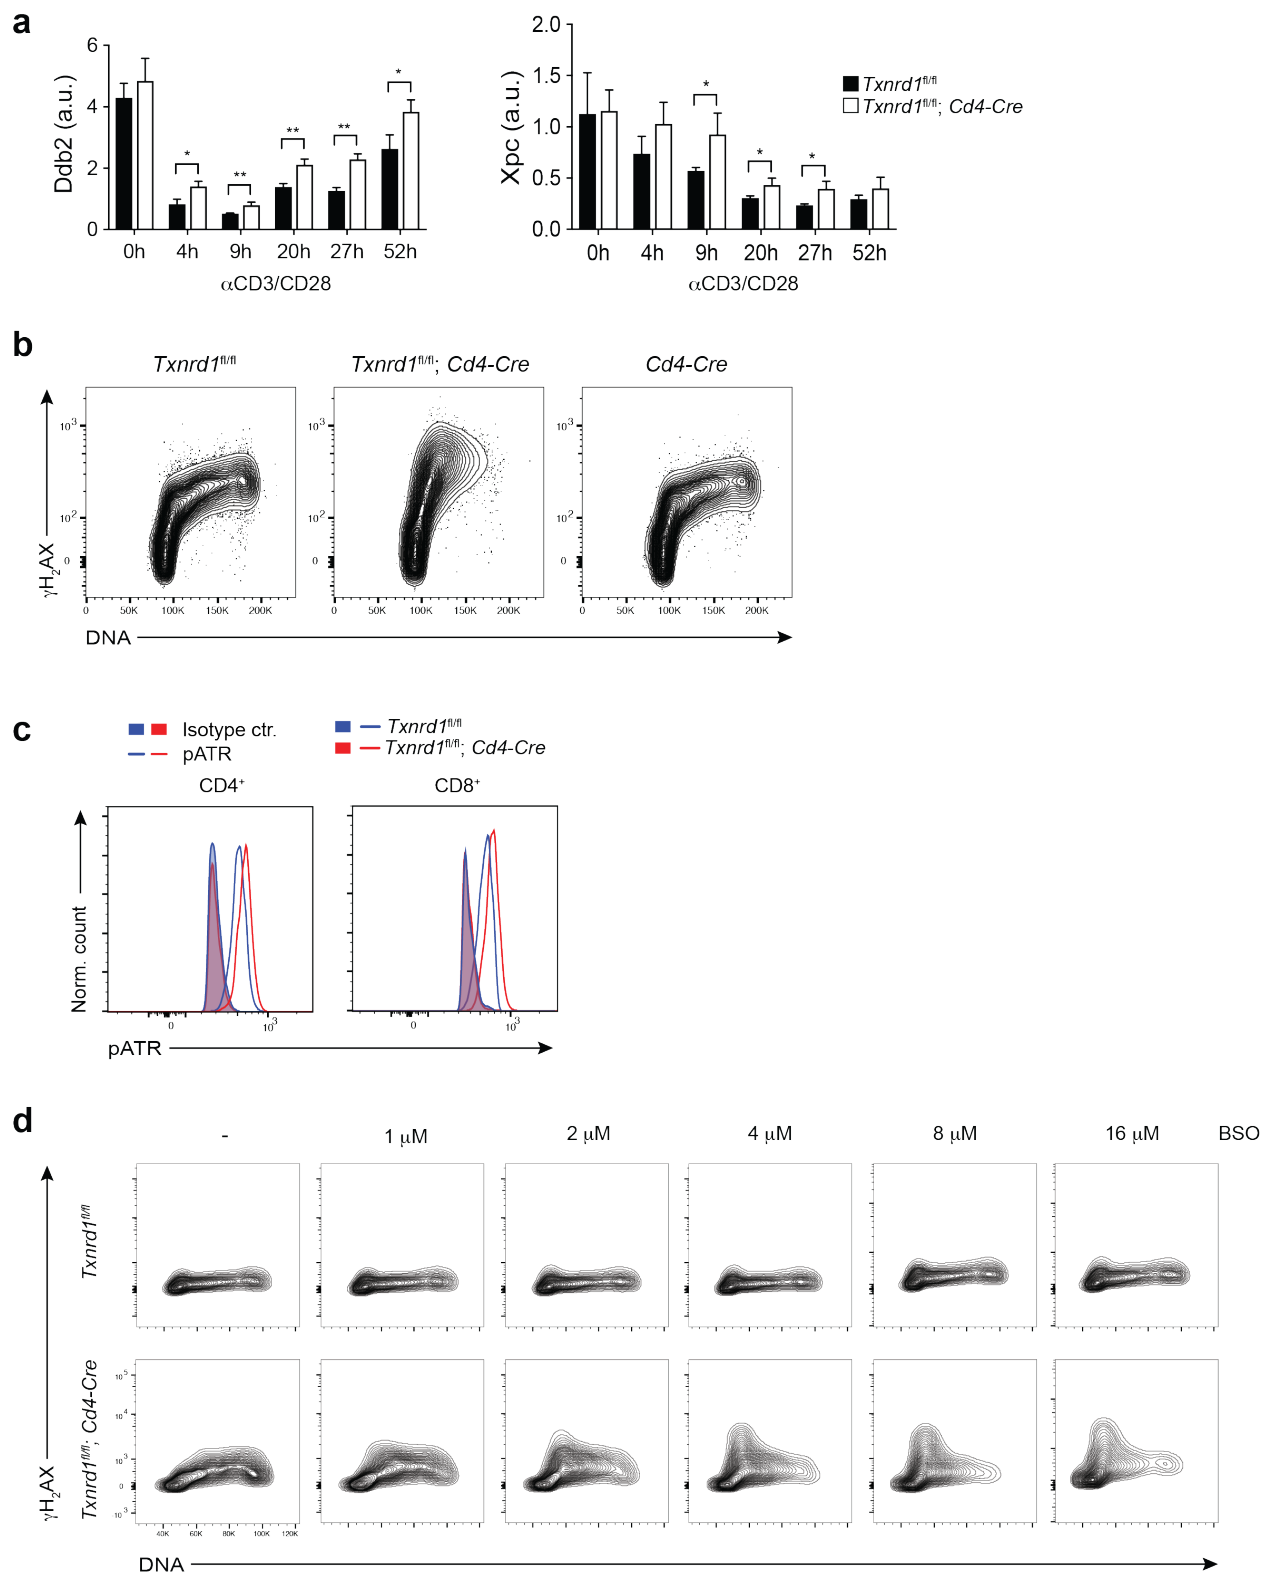

**Supplementary Figure 8. *Txnrd1* deficiency leads to replication stress.**

Magnetically-sorted T cells from spleen and peripheral LNs of *Txnrd1<sup>fl/fl</sup>* and *Txnrd1<sup>fl/fl</sup>;Cd4-Cre* mice were stimulated in  $\alpha$ CD3/CD28-coated plates in vitro. (a) *Ddb2* (left) and *Xpc* (right) expression levels in T cells determined by RT-PCR (n=3). (b) Representative FACS plots depicting  $\gamma$ H<sub>2</sub>AX levels and DNA content in T cells from *Txnrd1<sup>fl/fl</sup>* (left), *Txnrd1<sup>fl/fl</sup>;Cd4-Cre* (middle) and *Cd4-Cre* (right) mice after 30h of stimulation. (c) Representative FACS plots depicting pATR (S428) levels in T cells after 30h of stimulation (pre-gated on cells in the S-phase of the cell cycle). (d) Representative FACS plots depicting  $\gamma$ H<sub>2</sub>AX levels and DNA content in T cells stimulated for 30h in the presence of the indicated concentrations of L-Buthionine-sulfoximine (BSO). Bar graphs show mean + standard deviation (a). Data are representative of two independent experiments. Student's *t* test (two-tailed, unpaired) was used to compare *Txnrd1<sup>fl/fl</sup>* and *Txnrd1<sup>fl/fl</sup>;Cd4-Cre* groups (a): \*,  $P \leq 0.05$ ; \*\*,  $P \leq 0.01$ .

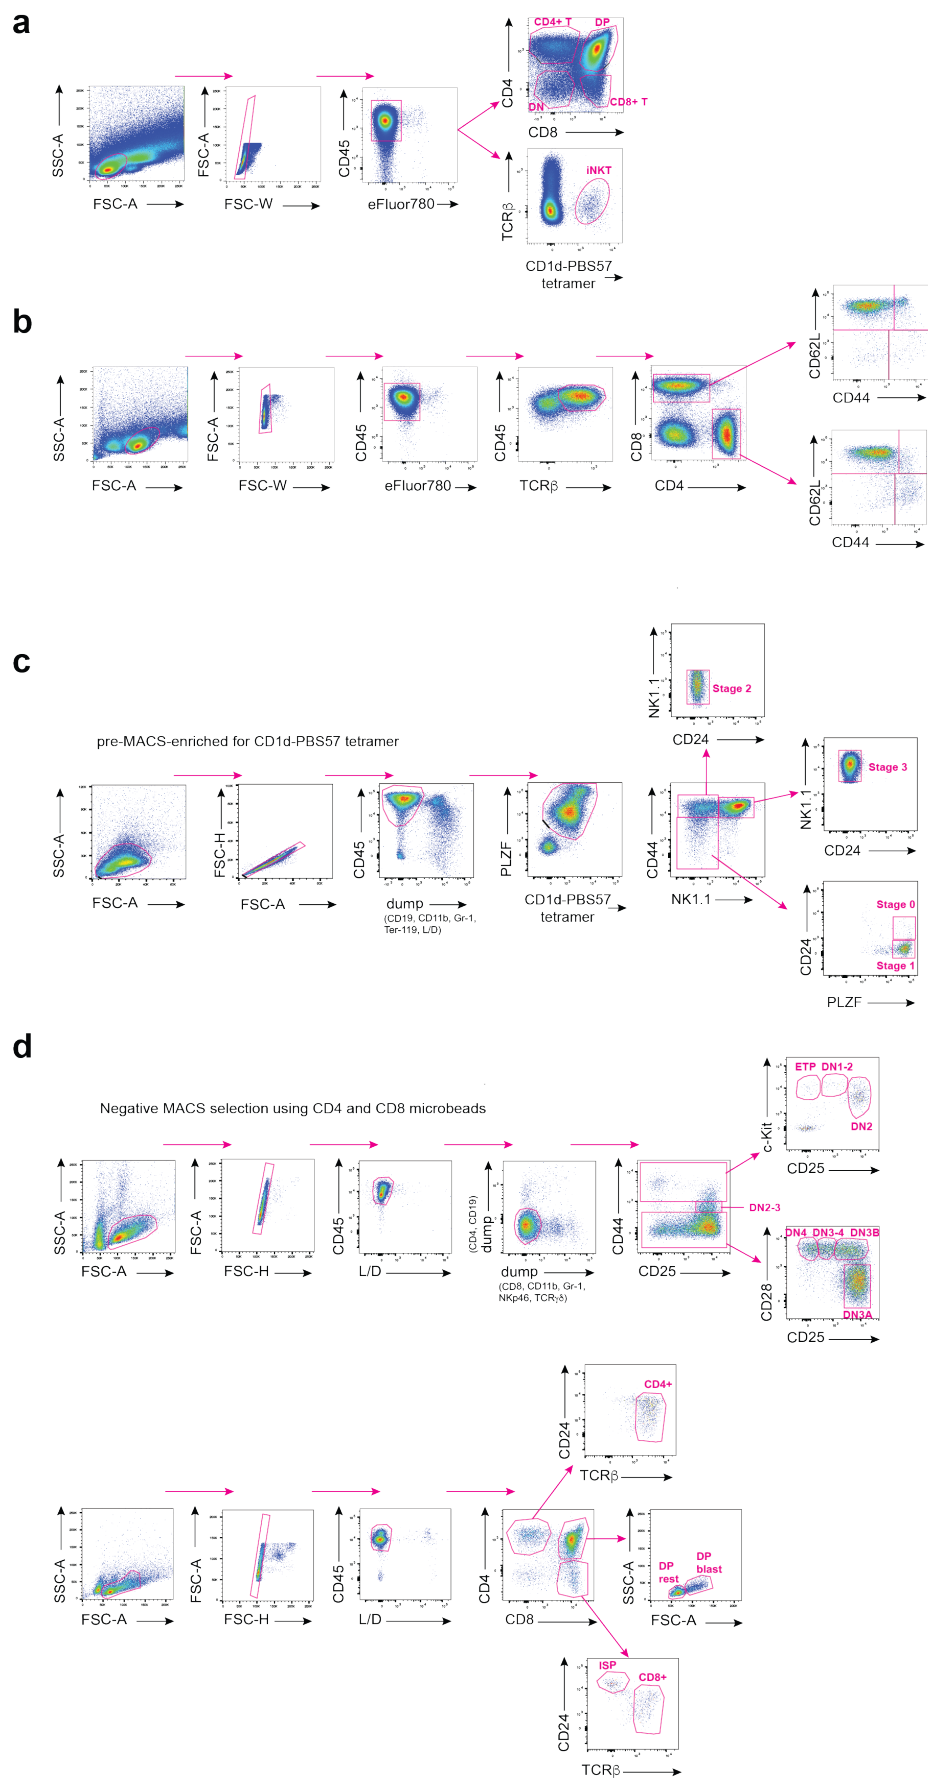



**Supplementary Figure 9. Gating strategies for Fig. 1 and Supplementary Fig. 1. (a-d)** Representative FACS plots showing gating strategies for Fig. 1a, d, f and Supplementary Fig. 1a, b, g **(a)**; for Fig. 1b-e and Supplementary Fig. 1a-f **(b)**; for Fig. 1g **(c)**; and for Fig. 1h and Supplementary Fig. 1h **(d)**. For analysis of the different iNKT developmental stages, single thymi were MACS-enriched with APC-labeled CD1d-PBS57-tetramer and anti-APC microbeads **(c)**. Before FACS-sorting, DN thymocytes were enriched by negative selection using microbeads conjugated to anti-mouse CD4 and anti-mouse CD8 **(d; top)**.

**a**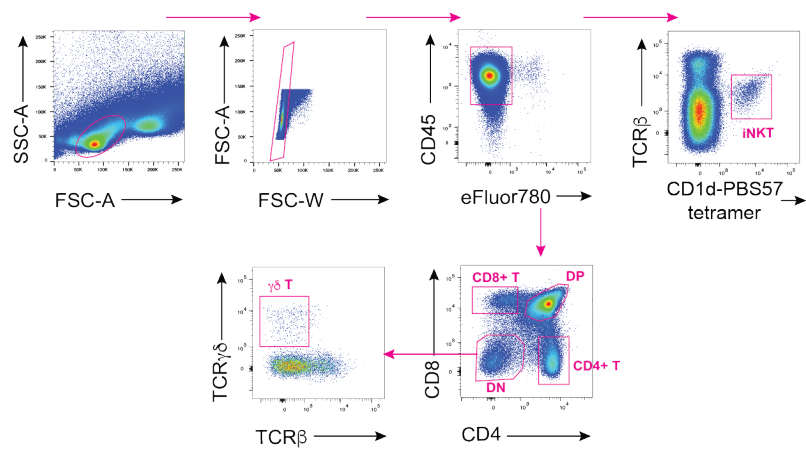**b**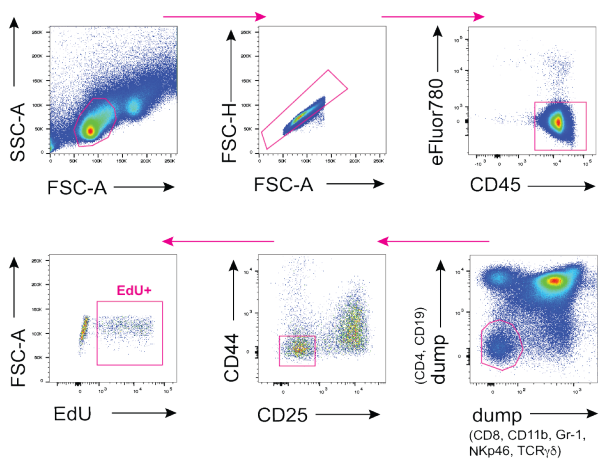**c**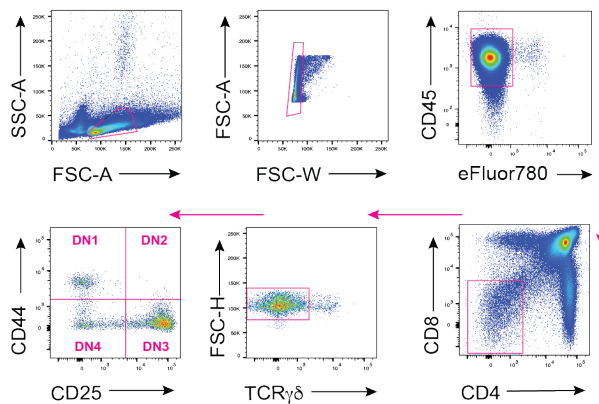

**Supplementary Figure 10. Gating strategies for Fig. 2 and Supplementary Fig. 2.**  
**(a-c)** Representative FACS plots showing gating strategies for Fig. 2c, d and Supplementary Fig. 2c **(a)**; for Fig. 2e **(b)**; and for Fig. 2f and Supplementary Fig. 2d **(c)**. CD4<sup>+</sup> and CD8<sup>+</sup> T cells depicted in Supplementary Fig. 2e were gated as described in Supplementary Fig. 9b.

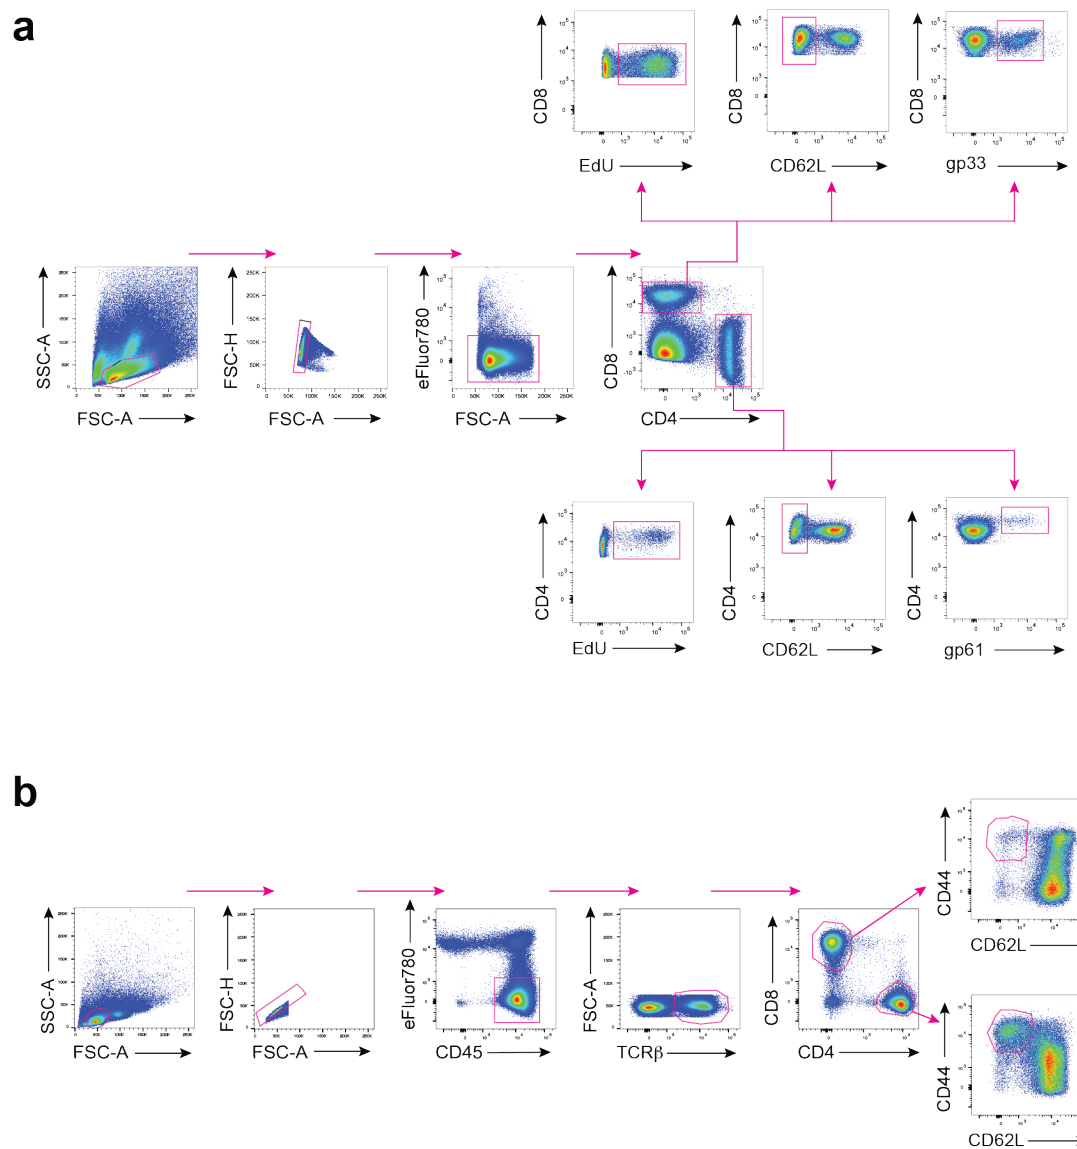

**Supplementary Figure 11. Gating strategies for Fig. 3 and Supplementary Fig. 3.**  
**(a-b)** Representative FACS plots showing gating strategies for Fig. 3a-c and Supplementary Fig. 3a-c **(a)**; and for Fig. 3f, g **(b)**.

# Negative MACS selection using CD4 and B220 microbeads

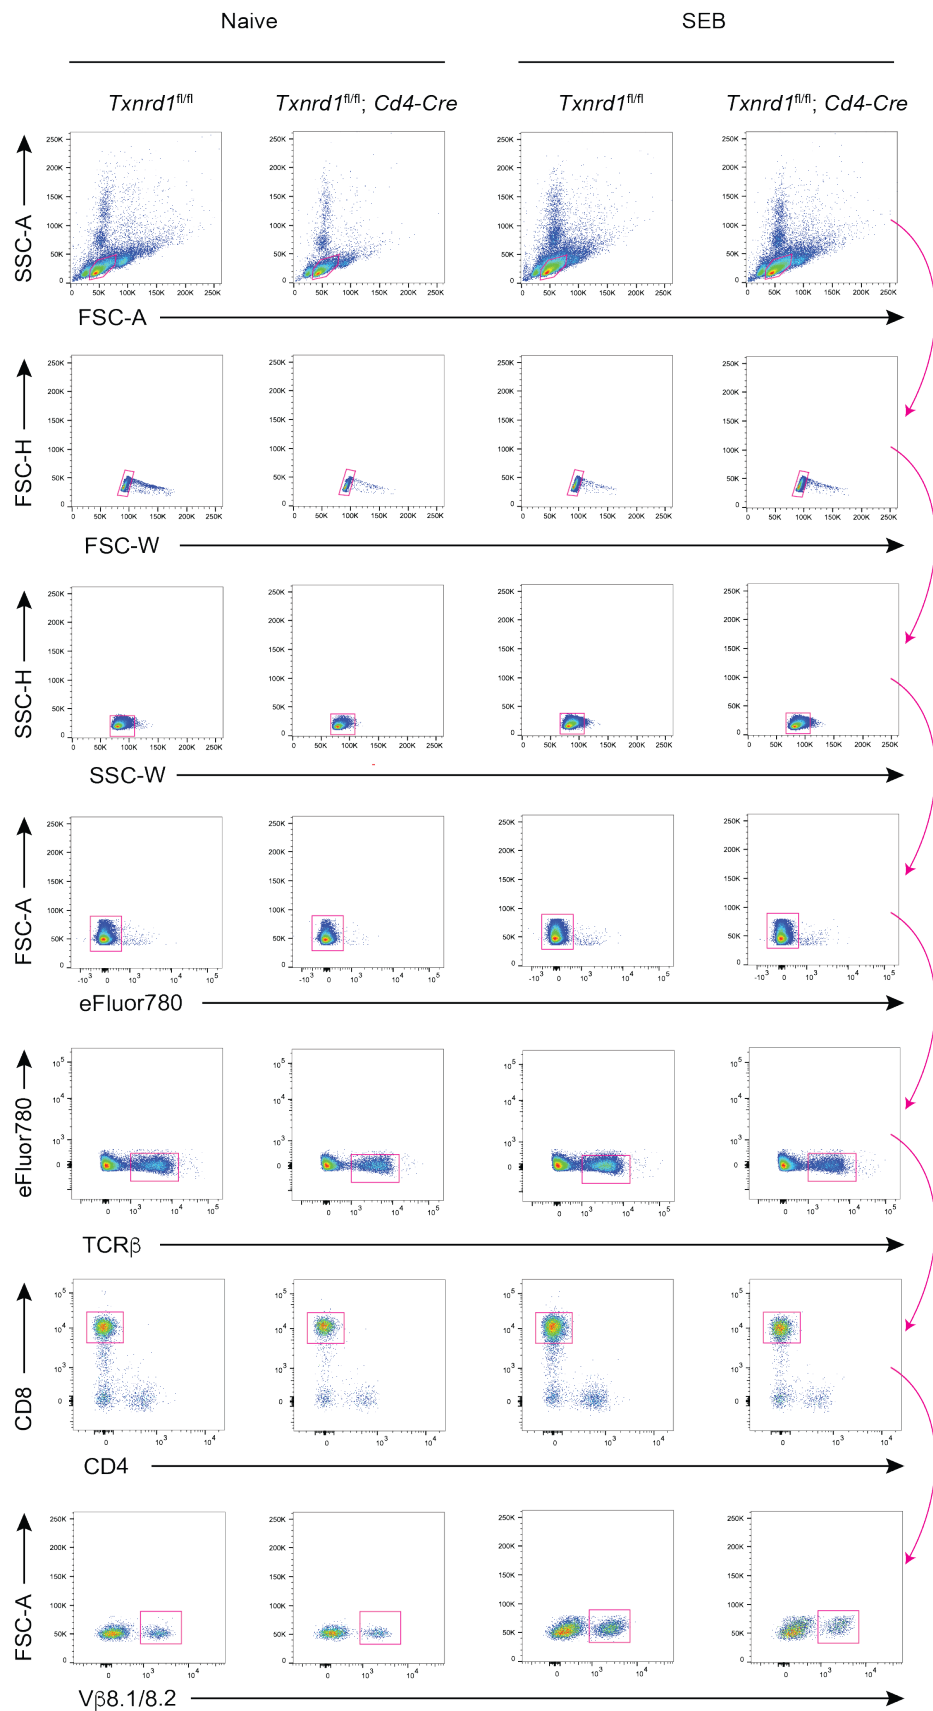

**Supplementary Figure 12. Gating strategy for FACS-sorted SEB-stimulated CD8<sup>+</sup> T cells used for RNA-seq in Fig. 6.** Before FACS-sorting, splenic CD8<sup>+</sup> T cells were enriched by negative selection using microbeads conjugated to anti-mouse CD4 and anti-mouse B220.

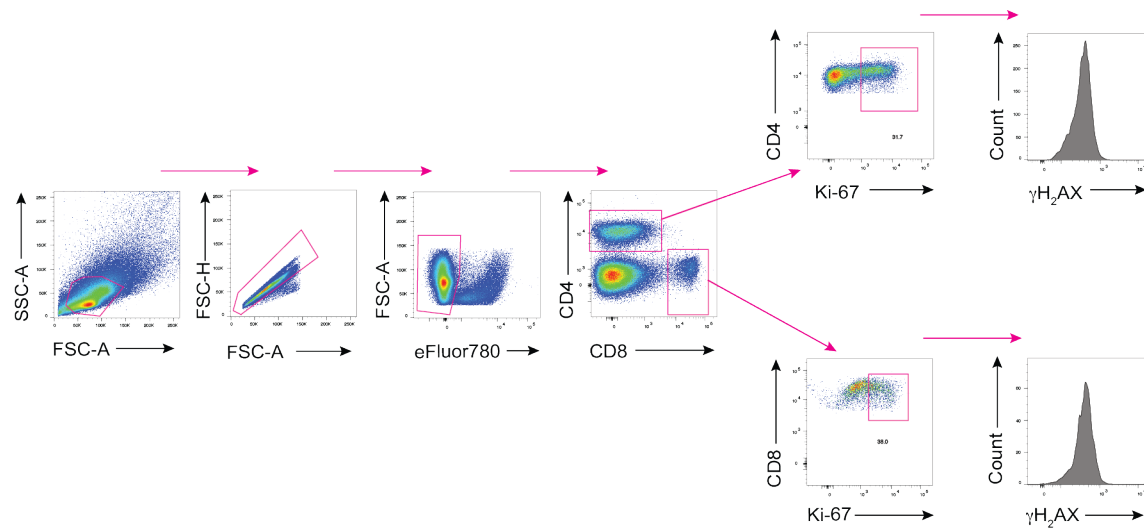

**Supplementary Figure 13. Gating strategies for Fig. 7d.** The first four FACS plots of the shown gating strategy were also used to gate CD4<sup>+</sup> and CD8<sup>+</sup> T cells for all the in vitro experiments.

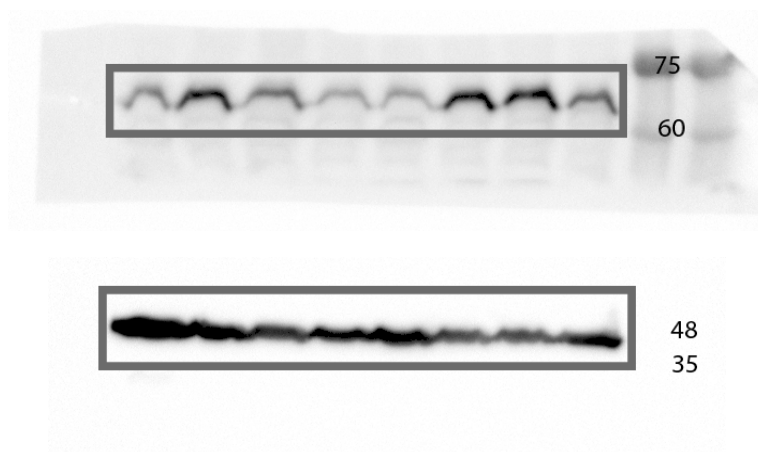

**Supplementary Figure 14. Uncropped Figure 5b.** A molecular weight standard (kDa) is marked on the right.



## Supplementary Tables

**Supplementary Table 1. Single best predictor analysis of the RNA-seq data shown in Fig. 6.** Linear regression model was performed to find the single best predictors in SEB-treated groups. Genes with *standard deviation* > 2 are depicted (genes were sorted according to descending standard deviation).

| Gene                 | Std dev | R-squared |
|----------------------|---------|-----------|
| <i>Cdkn1a</i>        | 2.750   | 0.918     |
| <i>Trav8d-2</i>      | 2.670   | 0.996     |
| <i>Trav8n-2</i>      | 2.635   | 0.967     |
| <i>Trav14d-3-dv8</i> | 2.584   | 0.935     |
| <i>Srxn1</i>         | 2.551   | 0.909     |
| <i>Rapsn</i>         | 2.417   | 0.993     |
| <i>Cxcl10</i>        | 2.362   | 0.926     |
| <i>Trav10</i>        | 2.333   | 0.979     |
| <i>Phf11d</i>        | 2.330   | 0.930     |
| <i>Iqsec2</i>        | 2.303   | 0.997     |
| <i>Ifitm1</i>        | 2.286   | 0.958     |
| <i>S1pr5</i>         | 2.281   | 0.999     |
| <i>Pdzd4</i>         | 2.250   | 0.910     |
| <i>Trav7-4</i>       | 2.153   | 0.908     |
| <i>Syne4</i>         | 2.139   | 0.945     |
| <i>Palld</i>         | 2.125   | 1.000     |
| <i>Trav7n-4</i>      | 2.086   | 0.970     |

**Supplementary Table 2. Antibodies and staining reagents for flow cytometry.**

| Specificity                               | Conjugation | Clone    | Supplier                   | Dilution |
|-------------------------------------------|-------------|----------|----------------------------|----------|
| 7-AAD                                     | -           | -        | eBioscience                | 1:50     |
| Annexin-V (for cell death)                | APC         | -        | BD Bioscience              | 1:50     |
| B220                                      | PerCP       | RA3-6B2  | Biolegend                  | 1:400    |
| c-Myc                                     | -           | D84C12   | Cell Signalling Technology | 1:100    |
| CD117                                     | Biotin      | 2B8      | Biolegend                  | 1:200    |
| CD19                                      | APC-Cy7     | 6D5      | Biolegend                  | 1:800    |
| CD19                                      | PE          | eBio1D3  | eBioscience                | 1:500    |
| CD23                                      | PE          | B3B4     | eBioscience                | 1:300    |
| CD25                                      | PE          | PC61     | eBioscience                | 1:400    |
| CD28                                      | PE          | E18      | eBioscience                | 1:300    |
| CD3e                                      | PE          | 145-2C11 | eBioscience                | 1:300    |
| CD4                                       | APC         | GK1.5    | BD Bioscience              | 1:1000   |
| CD4                                       | APC-Cy7     | GK1.5    | Biolegend                  | 1:1000   |
| CD4                                       | FITC        | GK1.5    | eBioscience                | 1:800    |
| CD4                                       | PE          | GK1.5    | BD Bioscience              | 1:500    |
| CD4                                       | PE-Cy7      | GK1.5    | Biolegend                  | 1:1000   |
| CD4                                       | PerCP-Cy5.5 | RM4-5    | Biolegend                  | 1:500    |
| CD11b                                     | PE          | M1/70    | BD Bioscience              | 1:1000   |
| CD44                                      | Biotin      | IM7      | Biolegend                  | 1:2000   |
| CD44                                      | PE          | IM7      | BD Bioscience              | 1:1000   |
| CD44                                      | PerCP-Cy5.5 | IM7      | eBioscience                | 1:500    |
| CD45.1                                    | APC         | A20      | Biolegend                  | 1:100    |
| CD45.1                                    | Biotin      | A20      | BD Bioscience              | 1:200    |
| CD45.2                                    | APC         | 104      | eBioscience                | 1:100    |
| CD45.2                                    | FITC        | 104      | eBioscience                | 1:300    |
| CD45.2                                    | PE          | 104      | eBioscience                | 1:200    |
| CD45.2                                    | PE-Cy7      | 104      | Biolegend                  | 1:200    |
| CD62L                                     | APC         | MEL-14   | Biolegend                  | 1:200    |
| CD62L                                     | FITC        | MEL-14   | eBioscience                | 1:500    |
| CD62L                                     | PE          | MEL-14   | BD Bioscience              | 1:500    |
| CD69                                      | FITC        | H1.2F3   | Biolegend                  | 1:300    |
| CD71                                      | FITC        | R17217   | eBioscience                | 1:200    |
| CD8                                       | APC         | 53-6.7   | eBioscience                | 1:600    |
| CD8                                       | FITC        | 53-6.7   | eBioscience                | 1:600    |
| CD8                                       | PE          | 53-6.7   | Biolegend                  | 1:2000   |
| CD8                                       | PE-Cy7      | 53-6.7   | Biolegend                  | 1:1000   |
| CD8                                       | PerCP       | 53-6.7   | Biolegend                  | 1:600    |
| eFluor® 780                               | -           | -        | eBioscience                | 1:2000   |
| Fc Block CD16/32                          | -           | 2.4G2    | Home-made                  | 1:1000   |
| FxCycle Violet Stain                      | -           | -        | Thermo Scientific          | 1:400    |
| Gr-1                                      | PE          | RB6-8C5  | Biolegend                  | 1:800    |
| Ki-67                                     | PE          | 16A8     | Biolegend                  | 1:1000   |
| LIVE/DEAD® fixable-yellow-dead-cell-stain | -           | -        | Life Technology            | 1:500    |
| NK1.1                                     | PE          | PK136    | eBioscience                | 1:300    |
| Phospho-ATR (Ser428)                      | -           | -        | Cell Signalling Technology | 1:100    |
| Phospho-H <sub>2</sub> AX (Ser139)        | AF488       | N1-431   | BD Bioscience              | 1:400    |
| Phospho-mTOR (Ser2448)                    | PE          | MRRBY    | eBioscience                | 1:100    |
| PLZF                                      | PE          | 9E12     | Biolegend                  | 1:1000   |
| Rabbit-IgG(H+L)                           | FITC        | -        | SouthernBiotech            | 1:500    |
| Streptavidin                              | APC         | -        | eBioscience                | 1:1000   |
| Streptavidin                              | APC-Cy7     | -        | Biolegend                  | 1:1000   |
| Streptavidin                              | BV711       | -        | BD Bioscience              | 1:1000   |
| Streptavidin                              | PE-Cy7      | -        | Biolegend                  | 1:1000   |
| Streptavidin                              | PerCP       | -        | Biolegend                  | 1:500    |
| TCR $\beta$                               | APC         | H57-597  | Biolegend                  | 1:500    |
| TCR $\beta$                               | PE-Cy7      | H57-597  | BD Bioscience              | 1:1000   |
| TCR $\gamma\delta$                        | Biotin      | GL3      | BD Bioscience              | 1:300    |
| Ter-119                                   | PE          | TER-119  | eBioscience                | 1:100    |
| Vb8.1/8.2                                 | FITC        | KJ16-133 | eBioscience                | 1:50     |

**Supplementary Table 3. Sequences of primers used for RT-PCR.**

| Target gene                             | Primer sequences                                                                             |
|-----------------------------------------|----------------------------------------------------------------------------------------------|
| <i>Cdkn1a</i>                           | Forward: 5'-AGACCAGCCTGACAGATTTC-3'<br>Reverse: 5'-CTGACCCACAGCAGAAGAG-3'                    |
| <i>c-Myc</i>                            | Forward: 5'-TTGAAGGCTGGATTCCTTTGGGC-3'<br>Reverse: 5'-TCGTTCGCAGATGAAATAGGGCTGT-3'           |
| <i>Ddb2</i>                             | Forward: 5'-GGCAAGGAGCTTTGGAAC-3'<br>Reverse: 5'-GTTTGATCTATGGAGGCTGTG-3'                    |
| <i>Grx1</i>                             | Forward: 5'-TGCAGAAAGACCCAAGAAATCCTCAGTCA-3'<br>Reverse: 5'-TGGAGATTAGATCACTGCATCCGCCTATG-3' |
| <i>Nqo1</i>                             | Forward: 5'-GGTGATATTTCAGTTCCCATTG-3'<br>Reverse: 5'-ACTCTCTCAAACCAGCCTTTC-3'                |
| <i>Srxn1</i>                            | Forward: 5'-GGTGGACACGATCCTGGCGG-3'<br>Reverse: 5'-GGTAGGCTGCATAGCGGTGGC-3'                  |
| <i>Txn1</i>                             | Forward: 5'-ATGACTGCCAGGATGTTGC-3'<br>Reverse: 5'-CCTTGTTAGCACCGGAGAAC-3'                    |
| <i>Txnip</i>                            | Forward: 5'-CCTGACCTAATGGCACCAG-3'<br>Reverse: 5'-AGGAATGAACATGCAGGAAAC-3'                   |
| <i>Txnrd1</i>                           | Forward: 5'-AAAGACGATGAACGTGTCTG-3'<br>Reverse: 5'-CTTAGTCAGCCCACACTTGAG-3'                  |
| <i>Txnrd1</i> DNA                       | Forward: 5'-ACAGGAGTGATCCCCACAGACC-3'<br>Reverse: 5'-CTGGAACCGCCCTGAATATCACC-3'              |
| <i>Txnrd1</i> mRNA in KO                | Forward: 5'-GCTGACTAAGCAGCAGCTGG-3'<br>Reverse: 5'-AACCTCAGCAGCCAGACTGG-3'                   |
| <i>Xpc</i>                              | Forward: 5'-GCAAGAAGGCAAAGAAACAC-3'<br>Reverse: 5'-TTCAGTAAGCTCTCCACCTC-3'                   |
| <i>Tbp</i><br>(housekeeping for mRNA)   | Forward: 5'-TTGACCTAAAGACCATTGCACTTC-3'<br>Reverse: 5'-TTCTCATGATGACTGCAGCAAA-3'             |
| <i>Txnrd1</i><br>(housekeeping for DNA) | Forward: 5'-ACAGATCGAAGCAGGAACAC-3'<br>Reverse: 5'-TTCAGAGAGGAAAGTCACCC-3'                   |

**Supplementary Table 4. MRM settings used for targeted metabolomics.**

| Metabolite | Q1  | Q2  |
|------------|-----|-----|
| AMP        | 346 | 134 |
| GMP        | 362 | 79  |
| dATP       | 490 | 159 |
| dGTP       | 506 | 79  |
