# Supplementary material for: The thioredoxin-1 system is essential for fueling DNA synthesis during T-cell metabolic reprogramming and proliferation
Source: Springer Nature journal article supplement (doi:10.1038/s41467-018-04274-w), 2018-05-04
Supplement: MOESM3 [file 41467_2018_4274_MOESM3_ESM.pdf › 41467_2018_4274_MOESM3_ESM.pdf]

## Description of Additional Supplementary Files

File Name: Supplementary Data 1

Description: **Metabolite abundances in *Txnrd1*-sufficient and -deficient T cells**
